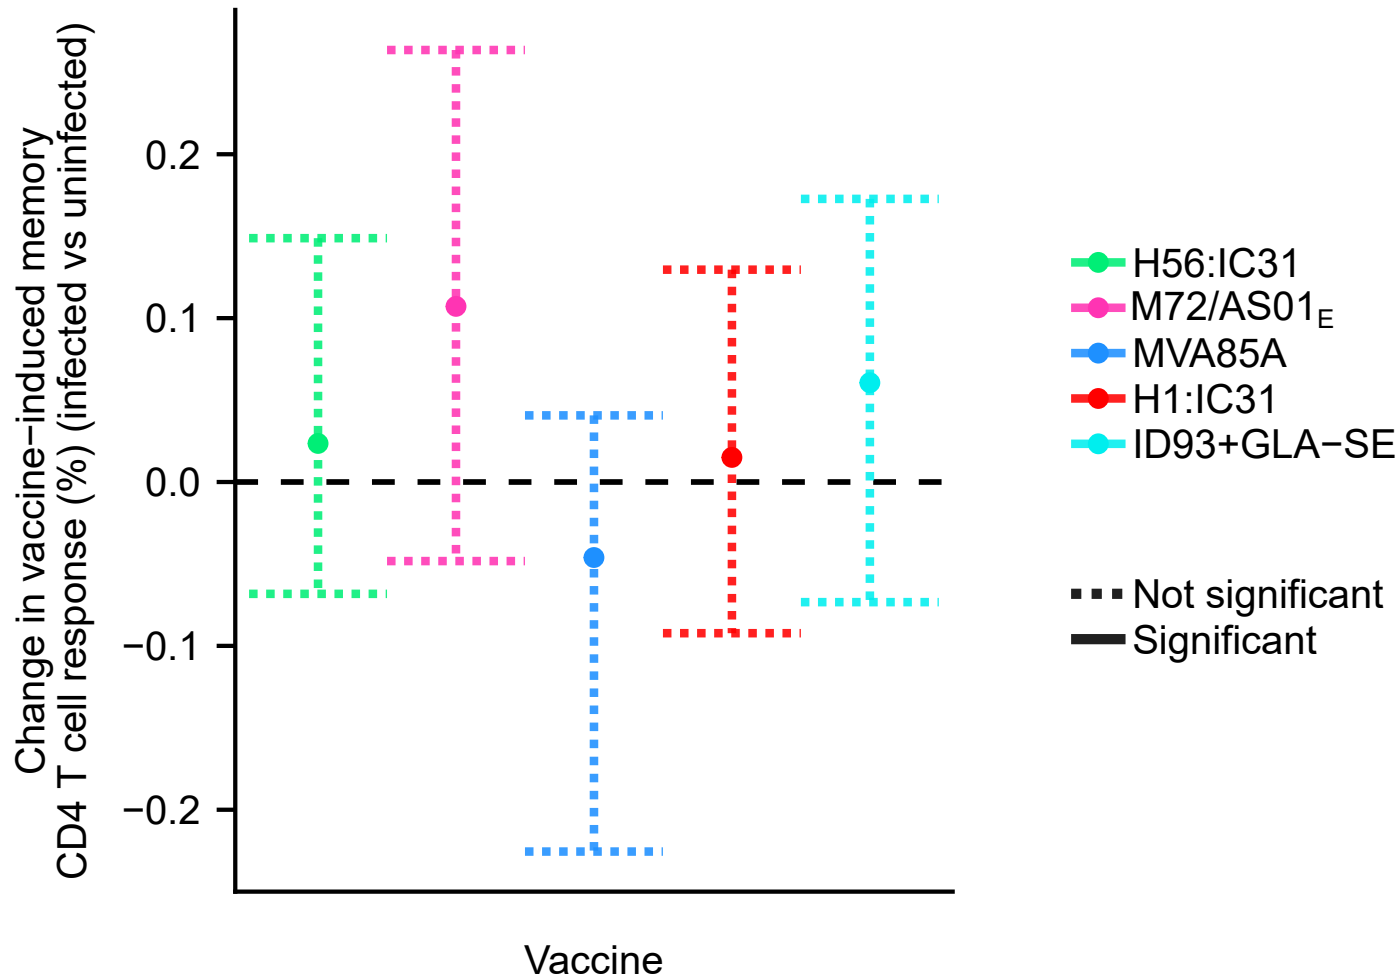

Source: https://storage.googleapis.com/plos-corpus-prod/10.1371/journal.ppat.1007643/2/ppat.1007643.s004.pdf
