**A**

**G-2+T+**

|         |             |                       |             |         |          |        |
|---------|-------------|-----------------------|-------------|---------|----------|--------|
| Vaccine | AERAS-402   | 216                   | 11          | 64      | 6        | 1      |
|         | MVA85A      | 399                   | 8           | 36      | 4        |        |
|         | H56:IC31    | 11                    | 1           | 1       |          |        |
|         | H1:IC31     | 5                     | 1           |         |          |        |
|         | ID93+GLA-SE | 1                     |             |         |          |        |
|         |             | M72/AS01 <sub>E</sub> | ID93+GLA-SE | H1:IC31 | H56:IC31 | MVA85A |

**G+2+T+**

|         |                       |    |        |                       |          |             |
|---------|-----------------------|----|--------|-----------------------|----------|-------------|
| Vaccine | AERAS-402             | 40 | 6      | 4                     | 2        | 2           |
|         | H1:IC31               | 32 | 118    | 1                     | 3        |             |
|         | ID93+GLA-SE           | 8  | 1      | 1                     |          |             |
|         | H56:IC31              | 4  | 1      |                       |          |             |
|         | M72/AS01 <sub>E</sub> | 3  |        |                       |          |             |
|         |                       |    | MVA85A | M72/AS01 <sub>E</sub> | H56:IC31 | ID93+GLA-SE |

Not significant Significant

**B**

**G+2-T-**

|         |                       |   |     |                       |             |            |         |
|---------|-----------------------|---|-----|-----------------------|-------------|------------|---------|
| Vaccine | MVA85A                | 2 | 118 | 3                     | 3           | 1          | 1       |
|         | H56:IC31              | 2 | 13  | 1                     | 1           | 2          |         |
|         | H1:IC31               | 1 | 1   | 1                     | 6           |            |         |
|         | No vaccine            | 1 | 36  | 1                     |             |            |         |
|         | ID93+GLA-SE           | 1 | 1   |                       |             |            |         |
|         | M72/AS01 <sub>E</sub> | 1 |     |                       |             |            |         |
|         |                       |   | BCG | M72/AS01 <sub>E</sub> | ID93+GLA-SE | No vaccine | H1:IC31 |

**G+2+T+**

|         |                       |     |            |        |          |                       |             |
|---------|-----------------------|-----|------------|--------|----------|-----------------------|-------------|
| Vaccine | BCG                   | 399 | 40         | 8      | 216      | 3                     | 2           |
|         | H1:IC31               | 399 | 4          | 1      | 1        | 1                     |             |
|         | ID93+GLA-SE           | 118 | 2          | 1      | 3        |                       |             |
|         | M72/AS01 <sub>E</sub> | 399 | 2          | 1      |          |                       |             |
|         | H56:IC31              | 27  | 1          |        |          |                       |             |
|         | MVA85A                | 1   |            |        |          |                       |             |
|         |                       |     | No vaccine | MVA85A | H56:IC31 | M72/AS01 <sub>E</sub> | ID93+GLA-SE |

Not significant Significant
