# Supplementary material for: A comparison of antigen-specific T cell responses induced by six novel tuberculosis vaccine candidates
Source: PLOS journal article supplement (doi:10.1371/journal.ppat.1007643), 2019-03-04

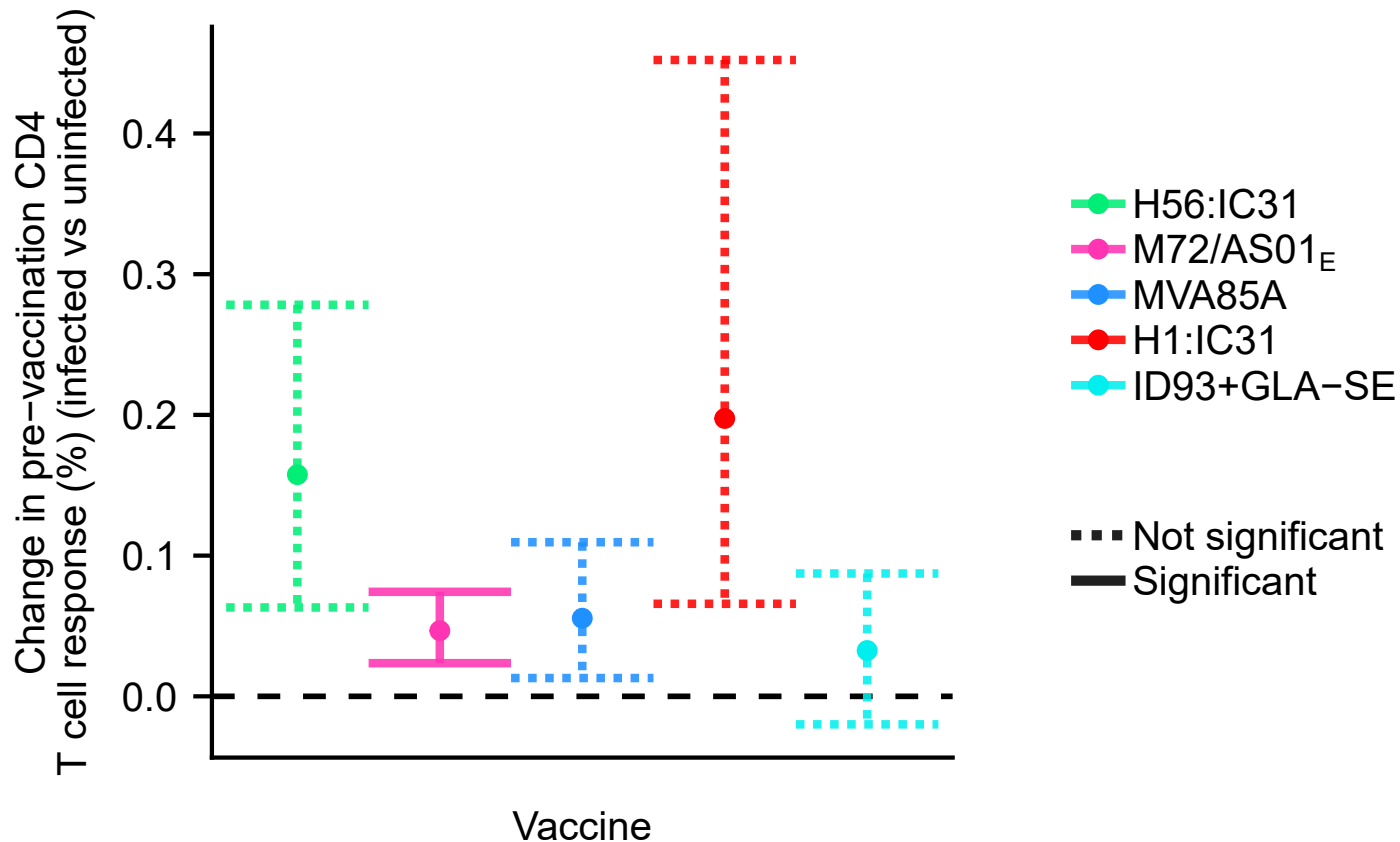

Supplement: S2 (10.1371/journal.ppat.1007643.s002) [file journal.ppat.1007643.s002]
